# Supplementary material
Source: PubMed Central journal article supplement (PMC3613901)
Supplement: JCI60083sd.pdf [file JCI60083sd.pdf]

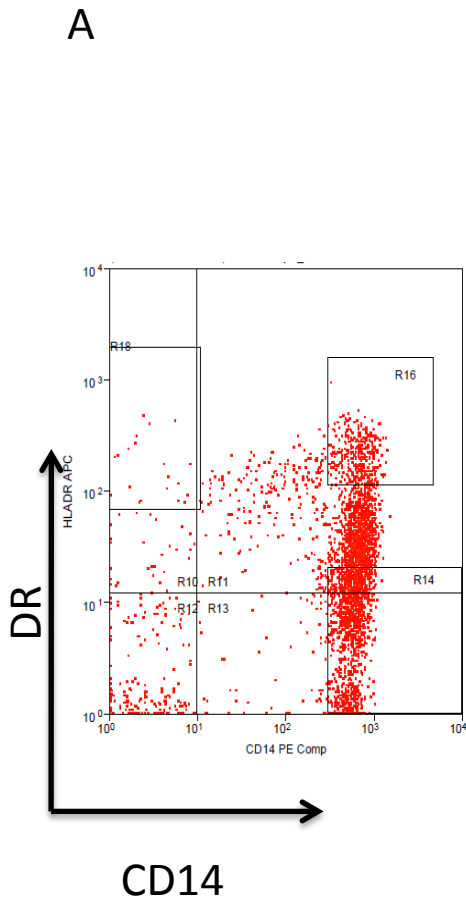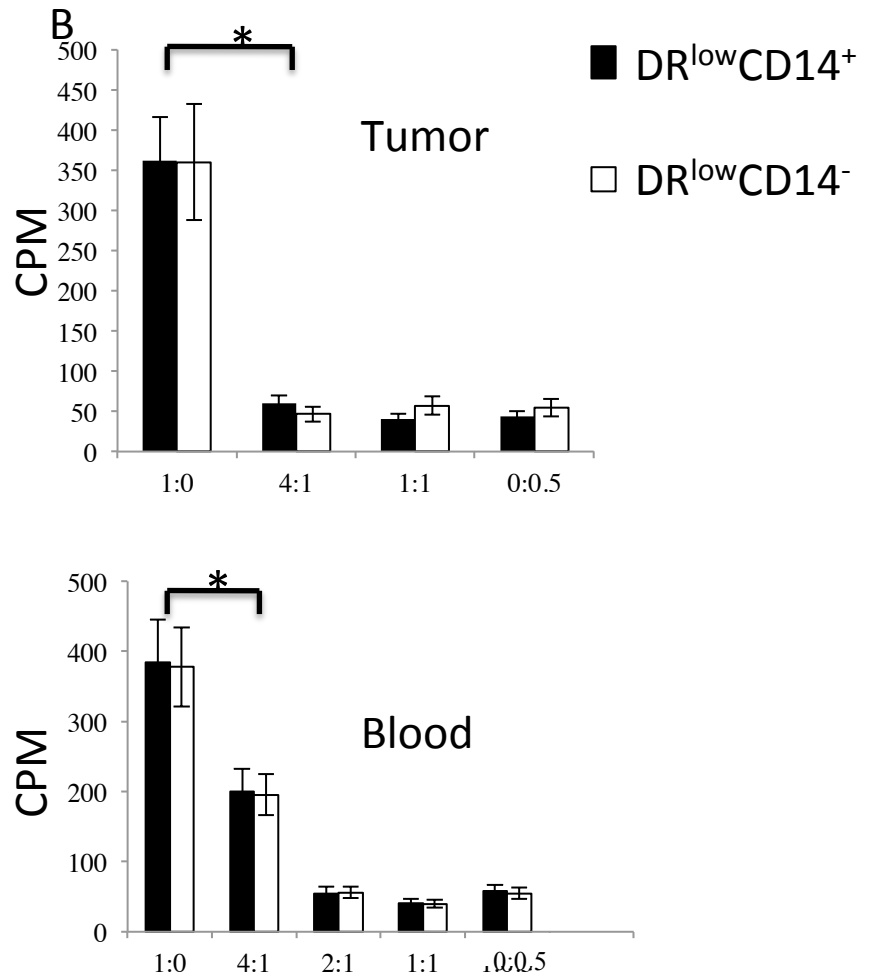

Supplemental Figure 1.

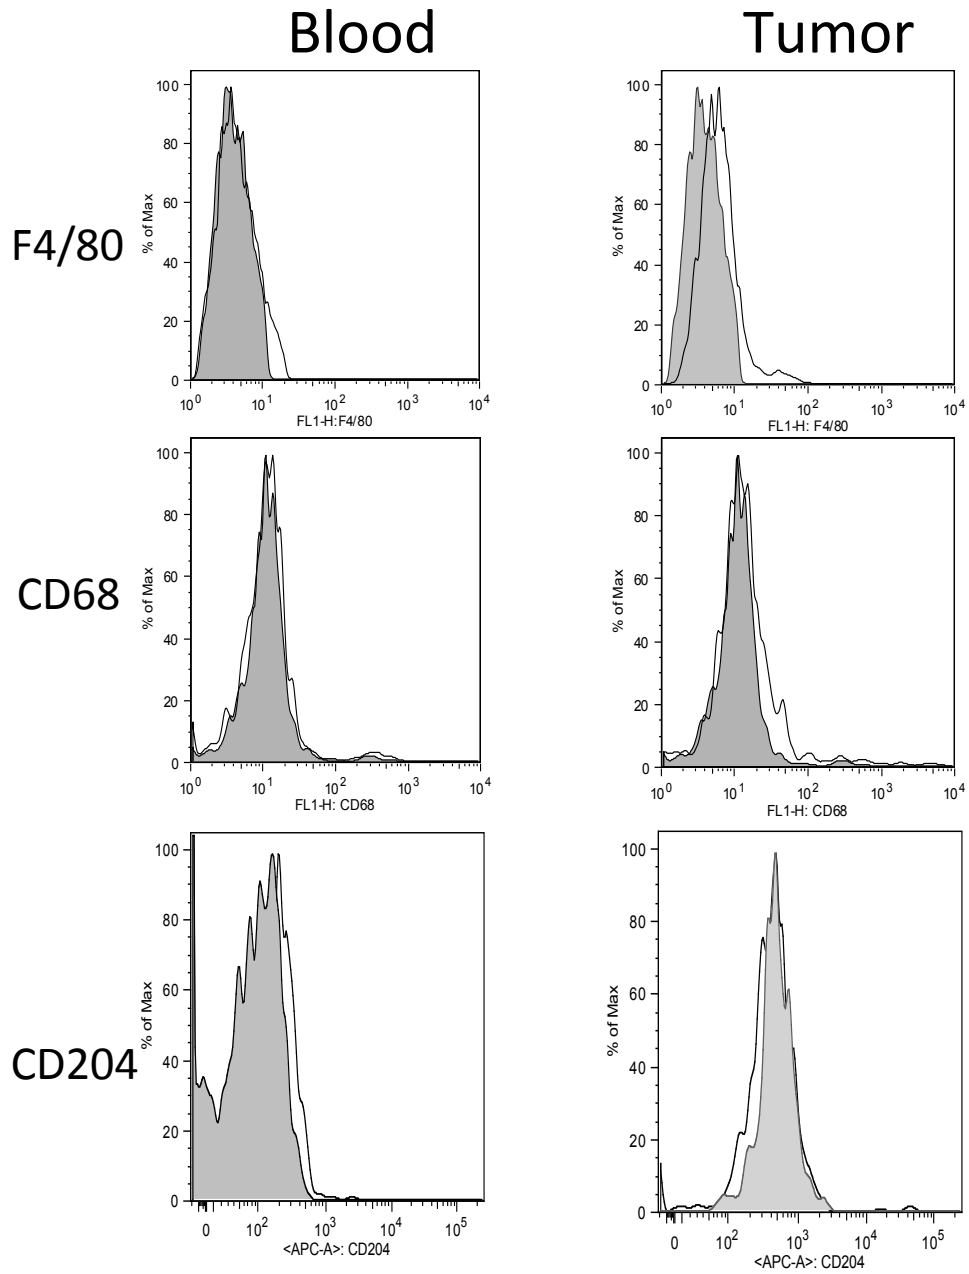

Supplemental Figure 2.

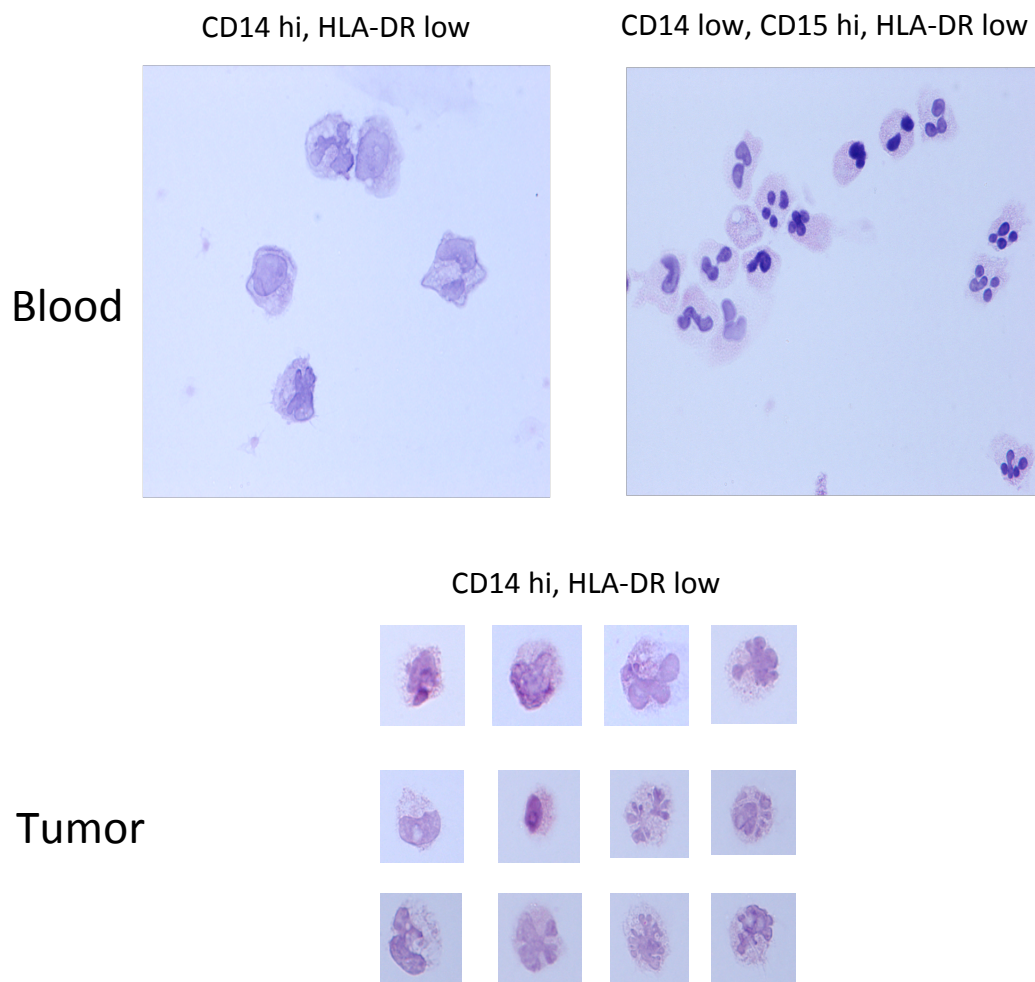

Supplemental Figure 3.

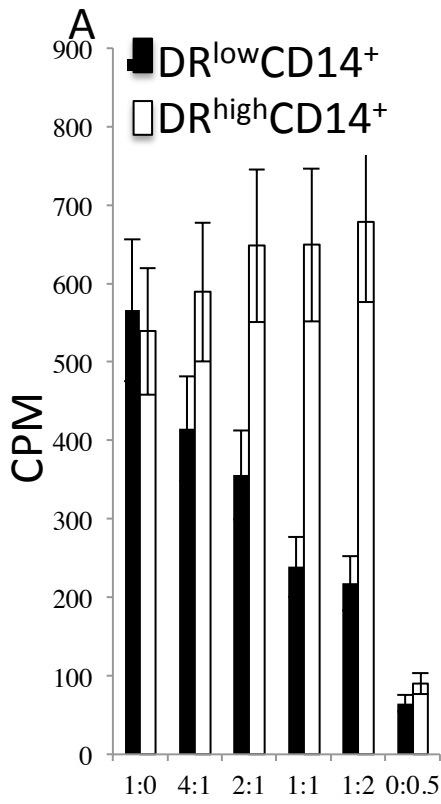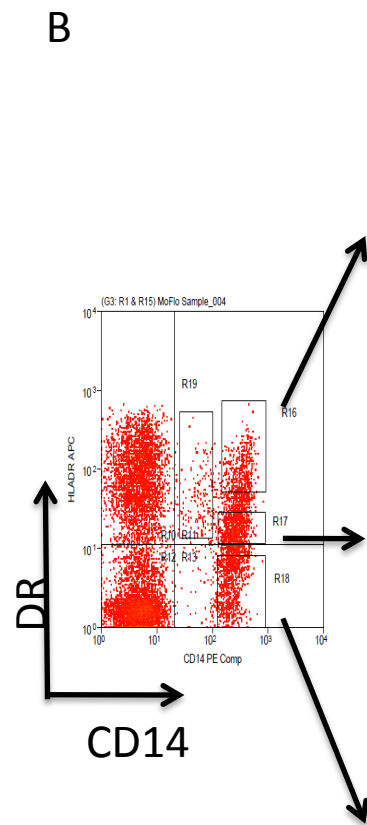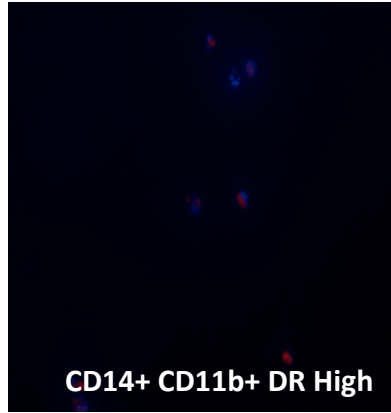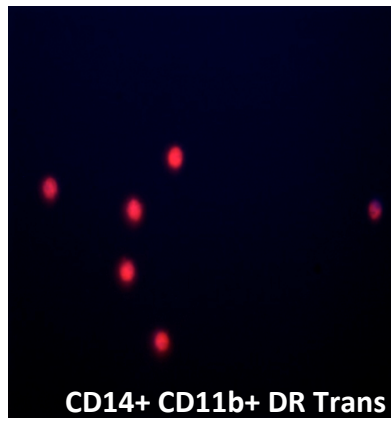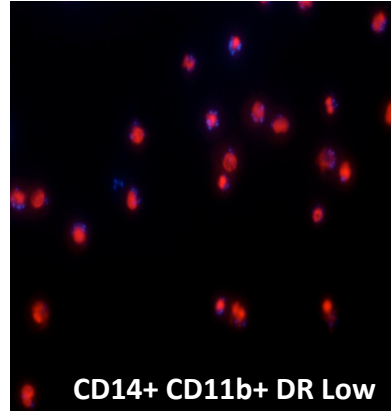

Supplemental Figure 4.

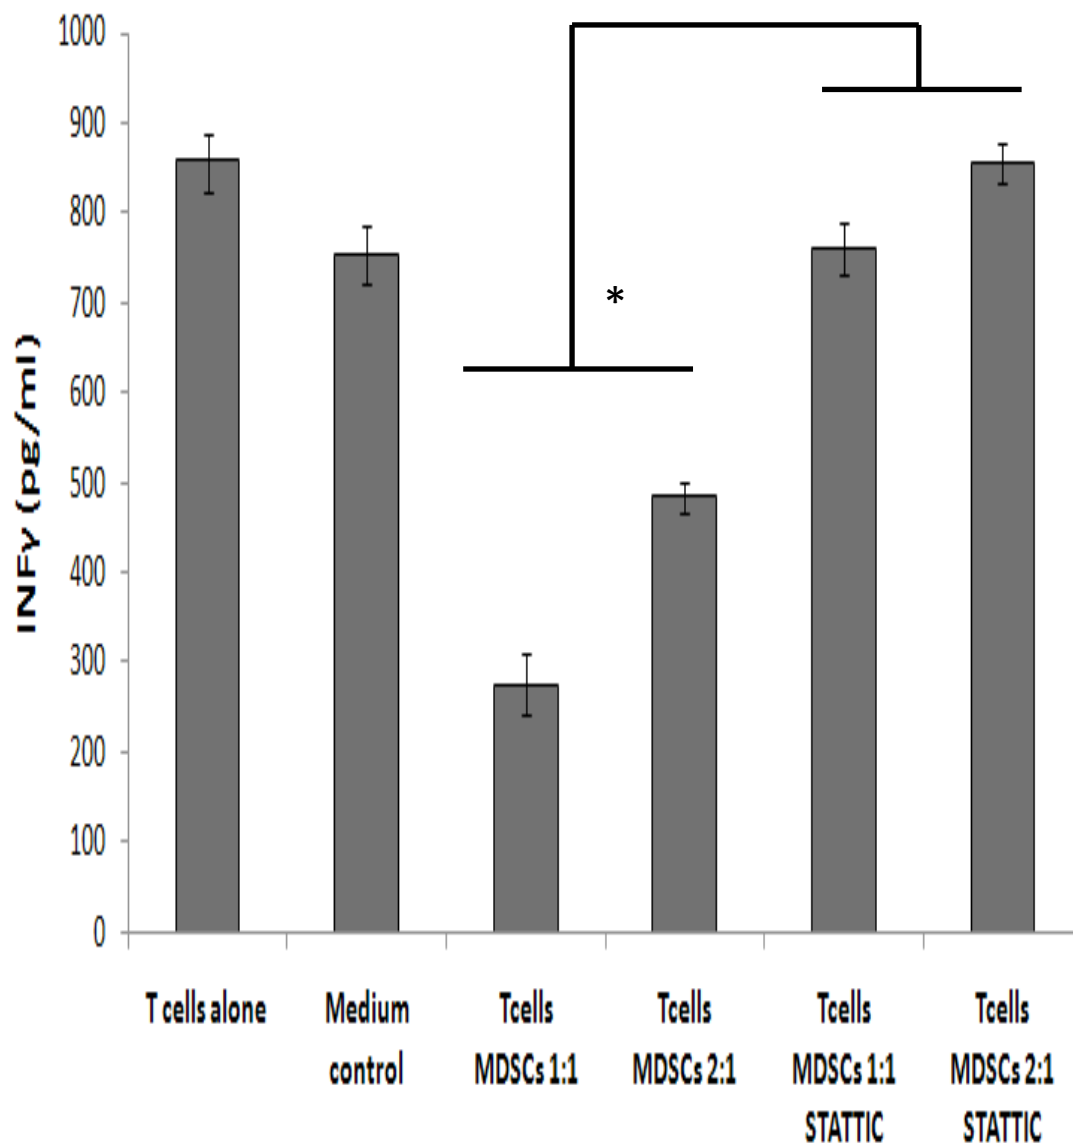

Supplemental Figure 5.

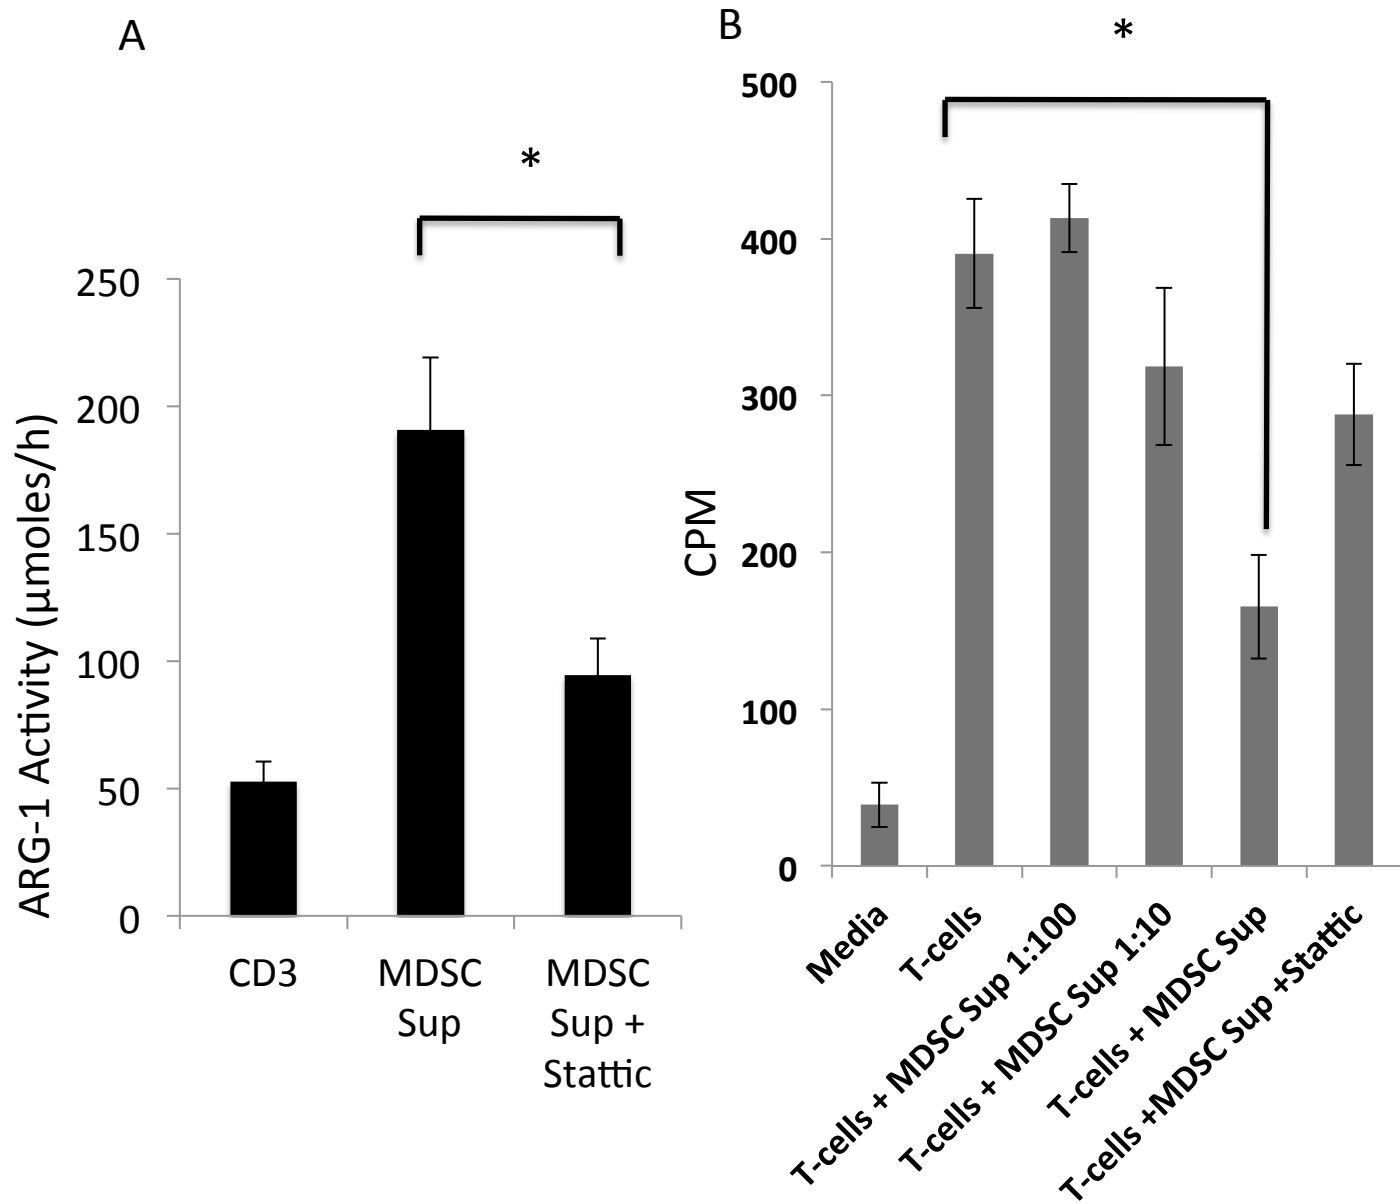

Supplemental Figure 6.

**Supplemental Figure 1. *There are two populations of MDSC cells from HNSCC patients.*** A. Representative FACS of myeloid cells from HNSCC patients obtained during sorting of the tumor specimen. X-axis represents CD14 staining and y-axis represents HLA-DR staining. Both CD14<sup>-</sup> and CD14<sup>+</sup> populations were collected. B. Sorted CD14<sup>-</sup>DR<sup>low</sup> and CD14<sup>+</sup>DR<sup>low</sup> cells from peripheral blood and tumor were used for suppression assays with autologous T-cells. X-axis label represents ratio of T-cell:MDSC (p<0.05,\*).

**Supplemental Figure 2. *Human blood and tumor CD14<sup>+</sup> HLA-DR<sup>-low</sup> MDSC do not express common macrophage markers.*** An aliquot of sorted CD14<sup>+</sup> HLA-DR<sup>-low</sup> MDSC were stained with murine anti-human CD68-Alexa Fluor conjugate (BioLegend), with rat anti-human F4/80-FITC conjugate (Abcam), and with mouse anti-human CD204-APC conjugate (R and D systems). Isotype antibodies were used as controls (shaded histograms).

**Supplemental Figure 3. *Human CD14<sup>+</sup> HLA-DR<sup>-low</sup> cells are suppressive MDSC in comparison to DR<sup>high</sup> myeloid cells.*** A. T-cell suppression assays were performed with CD14<sup>+</sup>DR<sup>low</sup> using CD14<sup>+</sup>DR<sup>high</sup> as the myeloid control cells. In some cases, CD14<sup>+</sup>DR<sup>high</sup> increased the proliferative potential of autologous T-cells as shown. B. Representative FACS from HNSCC patients obtained during sorting of the peripheral blood. Sorted CD14<sup>+</sup> cells were fractionated and their ROS level were analyzed using DHE staining (original magnification, x200).

**Supplemental Figure 4. *CD14<sup>+</sup> HLA-DR<sup>-low</sup> MDSC are monocytic cells, while CD14<sup>-</sup> HLA-DR<sup>-low</sup> MDSC have both polymorphonuclear and monocytic cells.*** Sorted cells were fixed onto slides using Cytospin, fixed, and stained with H&E. Tumor CD14<sup>+</sup> HLA-DR<sup>-low</sup> MDSC cells are mostly monocytic looking similar to CD14<sup>+</sup> HLA-DR<sup>-low</sup> MDSC from blood, and sorted CD14<sup>-</sup> HLA-DR<sup>-low</sup> MDSC from peripheral blood displayed more polymorphonuclear

morphology (Original magnification, x600). Tumor MDSC samples were frequently less concentrated and only 1-2 cells could be visualized under a comparable field. To present representative histology from matched specimens, we displayed individual cells from different fields in the tumor compartment. All pictures are from a single patient.

**Supplemental Figure 5. *CD14<sup>+</sup> HLA-DR<sup>-low</sup> MDSC suppress expression of IFN $\gamma$  from T-cells, and STAT3 inhibition blocks the MDSC dependent decrease in IFN $\gamma$  expression.*** Autologous T-cells were mixed with MDSC under stimulating conditions identical to <sup>3</sup>H-thymidine uptake assays. ELISA was used to quantitate of IFN $\gamma$  in the supernatant.

**Supplemental Figure 6. *Supernatant harvested from cultured HNSCC MDSC has arginase I activity and can suppress T-cells.*** A. Conditioned media from sorted MDSC were harvested over 3 days in vitro and this was used for arginase assay as described in the Methods section. After L-arginine substrate was incubated for 1 hr, the urea concentration was measured at 540 nm. ARG1 assay with control samples with non-conditioned media were subtracted and this activity was decreased in comparison to conditioned media from MDSC treated with STAT3IC (p<0.05, \*). B. Conditioned media from sorted MDSC was incubated with T-cell stimulation assay. Diluted MDSC supernatant decreased the proliferative potential of T-cells (1:10 dilution), but only non-diluted supernatant showed statistically significant T-cell proliferation (p<0.05, \*). Addition of STAT3IC to MDSC decreased the ability of the MDSC supernatant to suppress T-cell proliferation.

**Supplemental Table 1.** Primer pairs used for ChIP assay. The site #s refers to the potential STAT3 binding sites noted in Figure 6 and Supplemental Table 2.



**Supplemental Table 2.** Sequence of the human ARG1 promoter region with the 6 potential pSTAT3 binding sites as predicted by the consensus sequences GGAAC. The binding site numbers correspond to the binding site numbers in Figure 6.

**Supplemental Table 1.** Primer pairs used for ChIP assay. The site numbers refer to the potential STAT3 binding sites noted in Figure 6.

Site #1

5'-GAAGTCAGCATGAGTTCACCAAG-3'

5'-GACATCGTAAGGAAATTTATC-3'

Site #2

5'-GAAATGTGTCTCATGGATTAAC-3'

5'-CGTCCTTGTAGAAGAAGGGCC-3'

Site #3

5'-GATTCTACAATTATTTTCCTG-3'

5'-CATGAGGGTAAATGGTTAATC-3'

Site #4

5'-GTGTCTGATGGACCAGATAAC-3'

5'-CTTGTGTTACATAGTTGCCAC-3'

Site #5

5'-GATGGATTCAGGAACTAAGTG-3'

5'-GAATGCTTTGTGCTTTGGAAG-3'

Site #6

5'-CAAAATGTTTTCCCACCAATAG-3'

5'-GTCAACCTCTATGCCCTGAGC-3'

**Supplemental Table 2.** Sequence of the human ARG1 promoter region (5' to 3') with the 6 potential pSTAT3 binding sites as predicted by the consensus sequences GGAAG.

TAGAAGTCAGCATGAGTTCACCAAGAAGTGGACCTGTCAAGGTCAGCCCATC  
AACTTTGACAG**GGAAG**<sup>1</sup>TCAGATTGGCAGAAGAAAAGGTAGTAAAGTG  
TGATGAGATTTTATTGAGACACCGGATAAATTTCCCTACGATGTCCTTGTGAA  
CAGGATGGAGTGGTTGAGTTGGAAATTAGTAATCAGTTGTATCTCAACTGAT  
GATTAATTAATGGGGCTATGCCAATCTGGGTTAAGGTTTCCAGTGGAAATGTCA  
CAGAGTGTGTTGTAAGTGTCTGCCTTATTCAACATTTTTATCAGTGACTTGGAA  
AAAGTCAAATGTTATCAAATTTGTGTCTGATGGACCAGATAACTCCACCTGTA  
TTTGGATATGTGCATTTTGTCTGGATGCCCTATTTAGGAAAGGCAGAG**GG**  
**AAG**<sup>4</sup>CGAGATGTTTTGAAGACAGCGACCAAGTTGGTGACCTGAAGGAAA  
GTGGCAACTATGTAACACAAGAAATTAGTGAGGTATTTTACAAAGATGGATT  
CAGGAACTAAGTGAGAAAGATAAGCTCTAAGGCAT**GGAAG**<sup>5</sup>AAAATG  
TAAACTACATACCTACAATTTGATGGGGTGGCAGGAATTTAATAAGACTTC  
CAAAGCACAAAGCATTTCGGGGGAAATTATACAAGTGTCTATTTTAAAATTGA  
GGATTTTGAGTGATAACATATAAAAAGTTATCAGCAGCAGACAAAATTCTCT  
GACCTCATGGAATTTAAATTCAAAATGTTTTCCACCAATAGGAAAAAGAA  
ATTAGTTTCTACTAAGTGAATTTTCCCTTTAAATTACAATTACATAATTTTAAA  
GTC**GGAAG**<sup>6</sup>GATCTTTAAGGTGCCTTTATTTTAAATTCATACTTTTGTAT  
GGTGACAAATGGTAGCTCAGGGGCATAGAGGTTGACACCTTCCAGCATTTA  
GACTATAAGCTCGACGGTTAAGTGGATTCAGAATGGCAGAGACTAAATCCCG  
ACTTTTCTTCTACAGCCTATGTTGGCAACGGGTCTGAGCTTCAGTTTATTCATC  
AGTATAATGGCACCAATGATGAGACTTCACATAAAAATTGGTATAAAATATAAA  
TATGGTATTTTGAAACAGAAGTGCATCGGACACATGGTAAAAACTCAATGTT  
AGCTATTTTATTTCTATACTTTGATTATGATATGATTCTACAATTATTTTCCCT  
GTACACCATACTTCAAAAATGGTAACCTCTCTGGGTTACCAATCAAGTAACTA  
ATTTTTTAAAGTAATCATCAAAAA**GGAAG**<sup>3</sup>TTATTACTCTTTATTATA  
TTATACCCTAAAAGTTTATGAAATGTGTCTCATGGATTAACCATTTACCCTCA  
TGTGTGAAATCTCAACTCAGGATTTTAGGGCT**GGAAG**<sup>2</sup>GGATGTGACA  
GACGATCTTGCCAAGCCCGGCCCTTCTTCTACAAGGACGTCTTCAGAGATCTG  
GAGGTGTCCTCATTAGATAAAGGTTGTTTATTCAACCCAAGTATAAATGGAA  
AAAAGATGCGCCCTCTGTCACTGAGGGTTGACTGACTGGAGAGCTCAAGTGC  
AGCAAAGAGAAGTGTGAGAGC**ATG**GAGCGCCAAGTCCAGAACCATAGGGAT  
TATTGGAGCTCCTT
